# Supplementary material for: Molecular Disorder in (‒)-Encecanescin
Source: MDPI journal article supplement (doi:10.3390/molecules19044695), 2014-04-15
Supplement: s1 [file s1]

## Supplementary Materials

**Figure S1.** (–)-Encecanescin (**1**): (a) Raman, (b) FTIR and (c) calculated spectra.

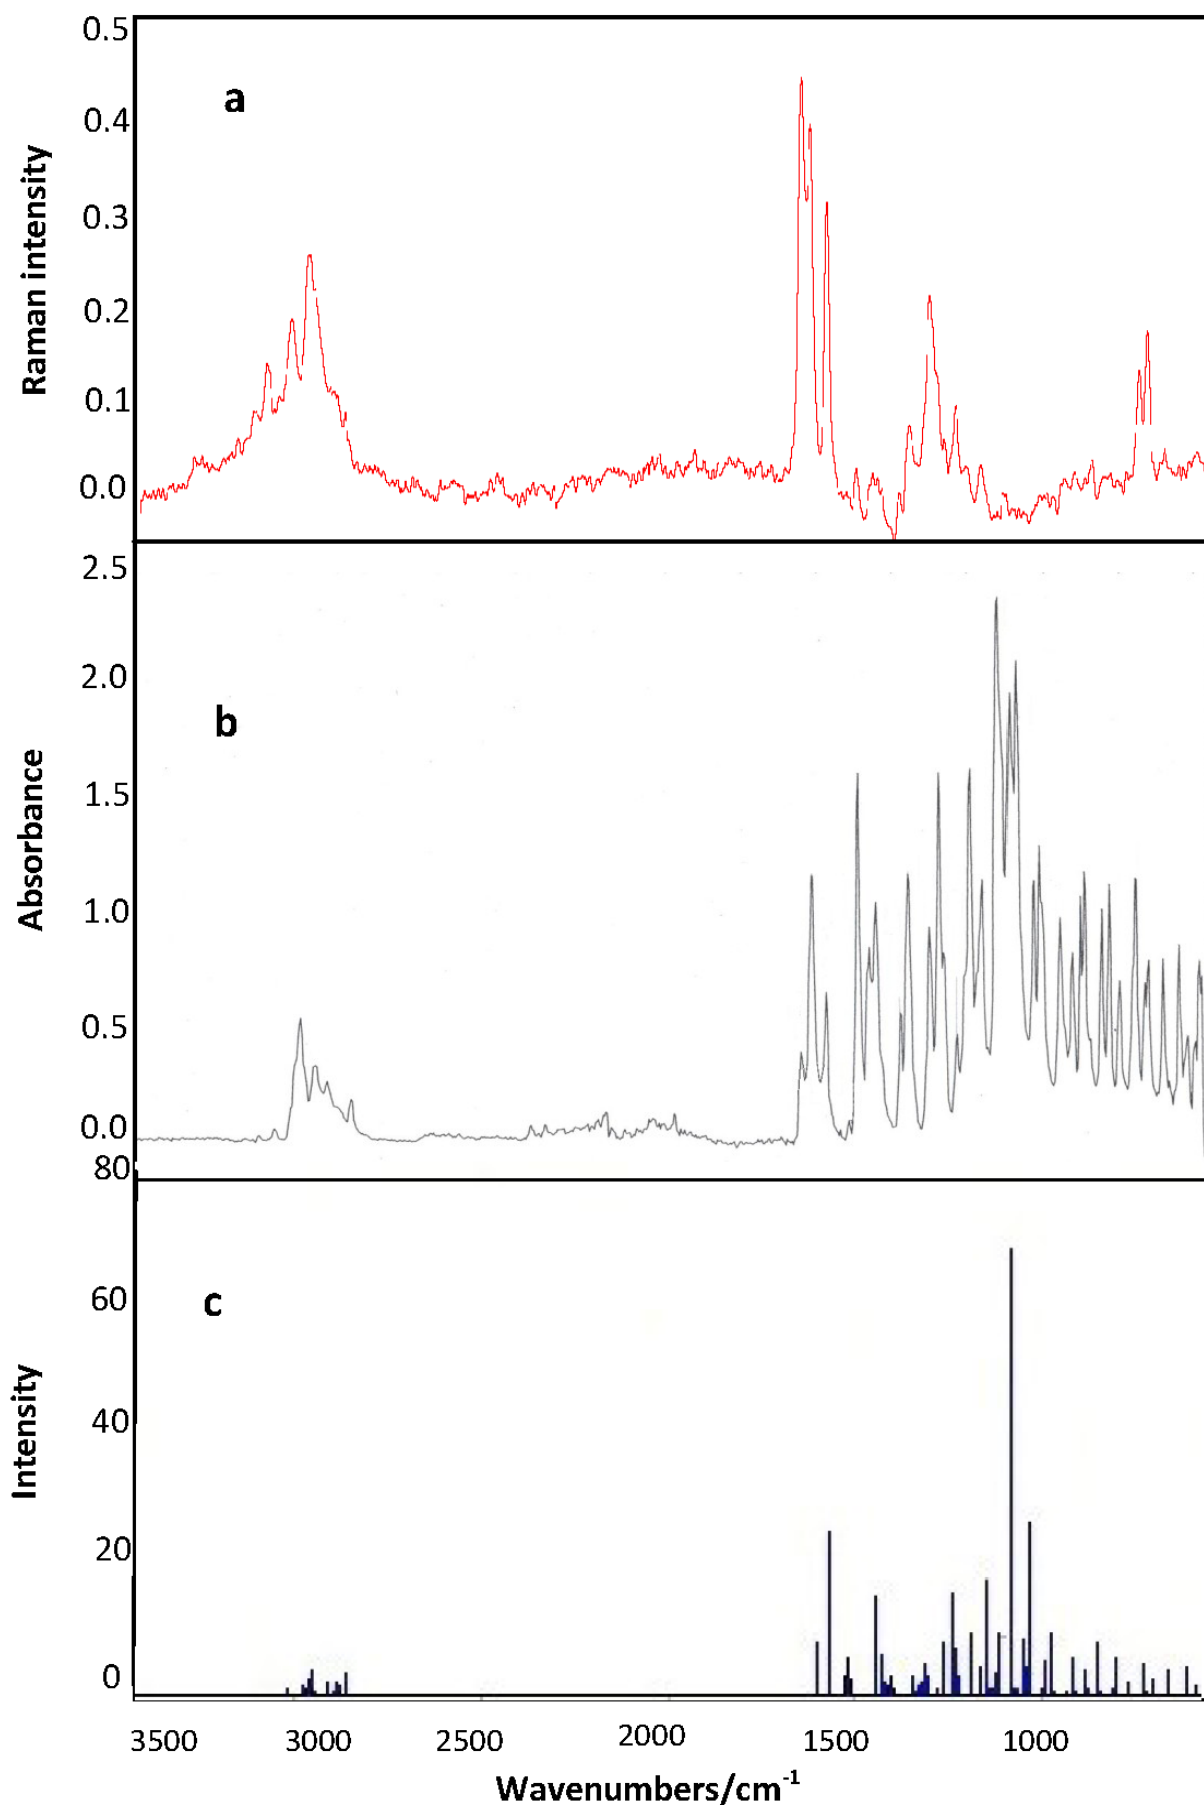

**Figure S2.** Magnification of the gHSQC spectrum of (–)-encecanescin (**1**) at 400 MHz in CDCl<sub>3</sub>.

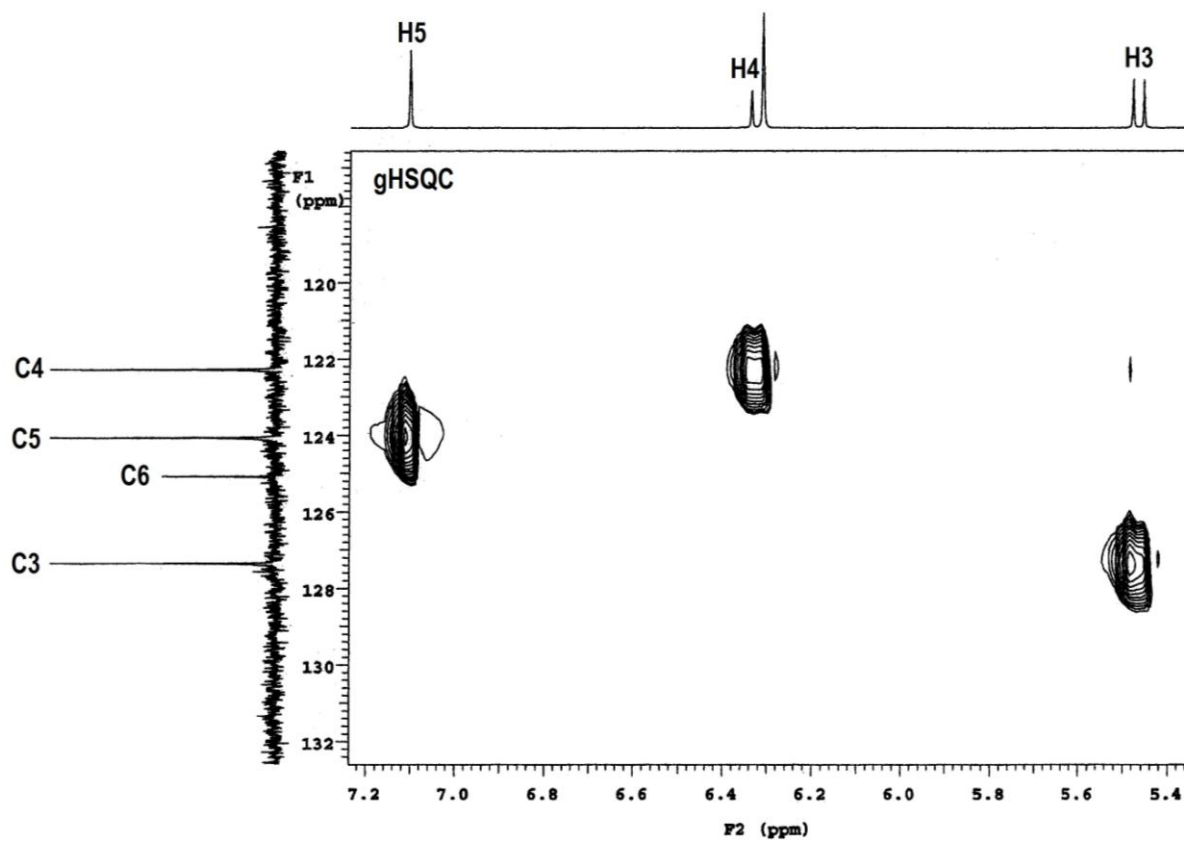

© 2014 by the authors; licensee MDPI, Basel, Switzerland. This article is an open access article distributed under the terms and conditions of the Creative Commons Attribution license (<http://creativecommons.org/licenses/by/3.0/>).
